# Supplementary material for: Distinguishing Laparoscopic Surgery Experts from Novices Using EEG Topographic Features
Source: MDPI journal article supplement (doi:10.3390/brainsci13121706), 2023-12-11
Supplement: s1 [file s1]

Table S1. Confusion Matrix for each iteration.

| Ite | Val | Confusion Matrix |    |    |     | Ite | Val | Confusion Matrix |    |    |     |
|-----|-----|------------------|----|----|-----|-----|-----|------------------|----|----|-----|
|     |     | TP               | FP | FN | TN  |     |     | TP               | FP | FN | TN  |
| 1   | 1   | 346              | 0  | 5  | 600 | 6   | 1   | 343              | 3  | 15 | 590 |
|     | 2   | 334              | 12 | 1  | 604 |     | 2   | 323              | 23 | 3  | 602 |
|     | 3   | 339              | 7  | 5  | 600 |     | 3   | 344              | 2  | 9  | 596 |
|     | 4   | 336              | 10 | 0  | 605 |     | 4   | 344              | 2  | 17 | 588 |
|     | 5   | 333              | 13 | 1  | 604 |     | 5   | 339              | 7  | 8  | 597 |
| 2   | 1   | 345              | 1  | 15 | 590 | 7   | 1   | 336              | 10 | 3  | 602 |
|     | 2   | 342              | 4  | 2  | 603 |     | 2   | 331              | 15 | 2  | 603 |
|     | 3   | 343              | 3  | 4  | 601 |     | 3   | 339              | 7  | 5  | 600 |
|     | 4   | 339              | 7  | 4  | 601 |     | 4   | 343              | 3  | 6  | 599 |
|     | 5   | 340              | 6  | 6  | 599 |     | 5   | 343              | 3  | 8  | 597 |
| 3   | 1   | 337              | 9  | 1  | 604 | 8   | 1   | 346              | 0  | 36 | 569 |
|     | 2   | 334              | 12 | 7  | 598 |     | 2   | 341              | 5  | 3  | 602 |
|     | 3   | 339              | 7  | 17 | 588 |     | 3   | 344              | 2  | 2  | 603 |
|     | 4   | 338              | 8  | 5  | 600 |     | 4   | 344              | 2  | 14 | 591 |
|     | 5   | 338              | 8  | 1  | 604 |     | 5   | 346              | 0  | 29 | 576 |
| 4   | 1   | 328              | 18 | 0  | 605 | 9   | 1   | 341              | 5  | 4  | 601 |
|     | 2   | 330              | 16 | 2  | 603 |     | 2   | 339              | 7  | 3  | 602 |
|     | 3   | 343              | 3  | 25 | 580 |     | 3   | 343              | 3  | 15 | 590 |
|     | 4   | 343              | 3  | 6  | 599 |     | 4   | 345              | 1  | 8  | 597 |
|     | 5   | 343              | 3  | 6  | 599 |     | 5   | 345              | 1  | 13 | 592 |
| 5   | 1   | 335              | 11 | 8  | 597 | 10  | 1   | 339              | 7  | 3  | 602 |
|     | 2   | 337              | 9  | 6  | 599 |     | 2   | 345              | 1  | 12 | 593 |
|     | 3   | 334              | 12 | 2  | 603 |     | 3   | 318              | 28 | 6  | 599 |
|     | 4   | 342              | 4  | 9  | 596 |     | 4   | 346              | 0  | 21 | 584 |
|     | 5   | 345              | 1  | 10 | 595 |     | 5   | 343              | 3  | 4  | 601 |
